# Supplementary material for: Alginate/Hydroxyapatite-Based Nanocomposite Scaffolds for Bone Tissue Engineering Improve Dental Pulp Biomineralization and Differentiation
Source: Hindawi journal article supplement (doi:10.1155/2018/9643721), 2018-08-02

# Characterization DPSCs-Passage 4

## Immunophenotype (FACS)

**CD45<sup>-</sup> CD90<sup>++</sup> SSEA4<sup>+</sup>  
CD29<sup>+</sup> CD73<sup>++</sup> CD105<sup>+</sup>**

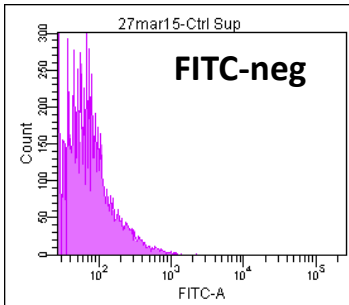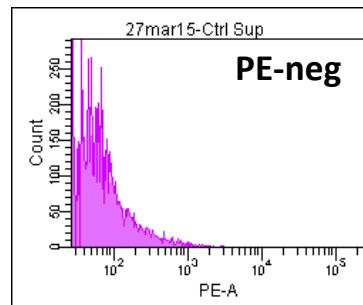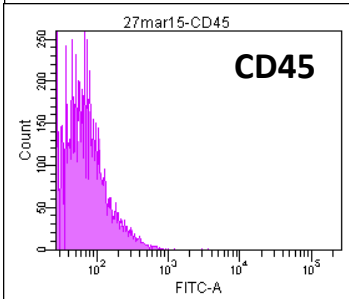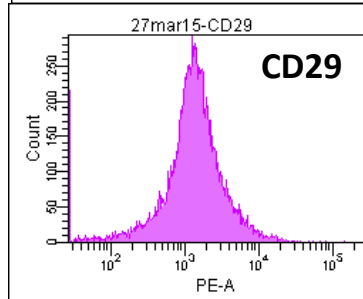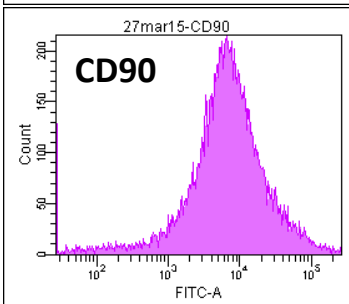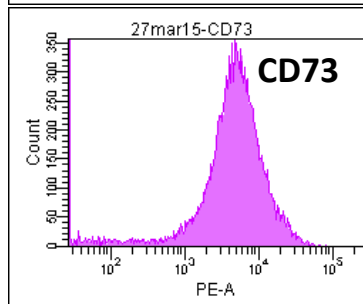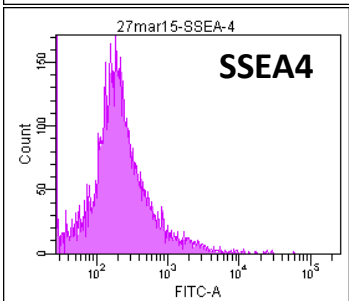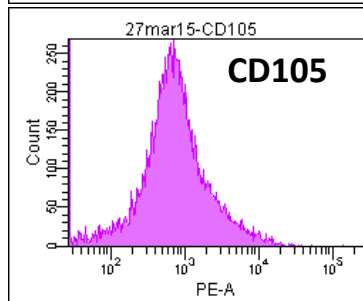

Supplement: f1 [file 9643721.f1.pdf]
